# Supplementary material
Source: Royal Society of Chemistry journal article supplement (doi:10.1039/d6cy00139d)
Supplement: d6cy00139d1.pdf [file d6cy00139d1.pdf]

1

## Supporting Information

2 **Boosting Catalytic Oxidation of Ethane over Ce-Doped**  
3 **Ru/Co<sub>3</sub>O<sub>4</sub>: Cooperation of Electron-Rich Ru and Oxygen**  
4 **Vacancies**

5 Yongxue An,<sup>ab</sup> Yunchong Wang,<sup>ab</sup> Haolong Huang,<sup>ab</sup> Yanfei Zheng,<sup>ab</sup> Cangpeng  
6 Shan,<sup>ab</sup> Tianao Zhang,<sup>ab</sup> Rui Han,<sup>ab</sup> Qian Zhao,<sup>\*ab</sup> and Qingling Liu<sup>\*ab</sup>

7 <sup>a</sup> Tianjin Key Lab of Indoor Air Environmental Quality Control, School of  
8 Environmental Science and Engineering, Tianjin University, Tianjin 300350, China

9 <sup>b</sup> State Key Laboratory of Engines, Tianjin University, Tianjin 300350, China

10 Corresponding author: [zhao\\_q@tju.edu.cn](mailto:zhao_q@tju.edu.cn),

11 [liuql@tju.edu.cn](mailto:liuql@tju.edu.cn)

12

|    |                                                                                                                                                             |
|----|-------------------------------------------------------------------------------------------------------------------------------------------------------------|
| 13 | <b>CONTENTS</b>                                                                                                                                             |
| 14 | <b>Text S1 Materials and methods</b>                                                                                                                        |
| 15 | <b>Text S2 Catalyst Characterization</b>                                                                                                                    |
| 16 | <b>Text S3 Catalyst Activity Evaluation</b>                                                                                                                 |
| 17 | <b>Fig. S1 Ethane conversion of different (a) Ru contents of Ru/Co<sub>3</sub>O<sub>4</sub> and (b) Ce</b>                                                  |
| 18 | <b>contents of Ru/xCe-Co<sub>3</sub>O<sub>4</sub>.</b>                                                                                                      |
| 19 | <b>Fig. S2 CO<sub>2</sub> yield of Ru/CeO<sub>2</sub>, Ru/Co<sub>3</sub>O<sub>4</sub> and Ru/0.1Ce-Co<sub>3</sub>O<sub>4</sub>.</b>                         |
| 20 | <b>Fig. S3 Water resistance test of Ru/0.1Ce-Co<sub>3</sub>O<sub>4</sub> in the presence of 10 vol.% H<sub>2</sub>O</b>                                     |
| 21 | <b>Fig. S4 Stability test of high temperature shock on Ru/Co<sub>3</sub>O<sub>4</sub> and Ru/0.1Ce-Co<sub>3</sub>O<sub>4</sub></b>                          |
| 22 | <b>for ethane oxidation.</b>                                                                                                                                |
| 23 | <b>Fig. S5 SO<sub>2</sub>-tolerant tests on Ru/Co<sub>3</sub>O<sub>4</sub> and Ru/0.1Ce-Co<sub>3</sub>O<sub>4</sub> for ethane oxidation.</b>               |
| 24 | <b>Fig. S6 Catalytic oxidation activity of VOCs on monolithic catalysts (VOCs of 800</b>                                                                    |
| 25 | <b>ppm and GHSV of 12000 h<sup>-1</sup>)</b>                                                                                                                |
| 26 | <b>Fig. S7 N<sub>2</sub> adsorption–desorption curve and pore diameter distribution of (a)</b>                                                              |
| 27 | <b>Co<sub>3</sub>O<sub>4</sub>. (b) 0.1Ce-Co<sub>3</sub>O<sub>4</sub>. (c) Ru/Co<sub>3</sub>O<sub>4</sub> and (d) Ru/0.1Ce-Co<sub>3</sub>O<sub>4</sub>.</b> |
| 28 | <b>Fig. S8 CO pulse patterns of Ru/Co<sub>3</sub>O<sub>4</sub> and Ru/0.1Ce-Co<sub>3</sub>O<sub>4</sub>.</b>                                                |
| 29 | <b>Fig. S9 The Co–O bond force constant (k) of CoO<sub>6</sub> in Co<sub>3</sub>O<sub>4</sub>, 0.1Ce-Co<sub>3</sub>O<sub>4</sub>,</b>                       |
| 30 | <b>Ru/Co<sub>3</sub>O<sub>4</sub> and Ru/0.1Ce-Co<sub>3</sub>O<sub>4</sub>.</b>                                                                             |
| 31 | <b>Fig. S10 O 1s XPS spectra of Ru/Co<sub>3</sub>O<sub>4</sub> and Ru/0.1Ce-Co<sub>3</sub>O<sub>4</sub>.</b>                                                |
| 32 | <b>Table S1 Catalytic activity for ethane oxidation over various catalysts</b>                                                                              |
| 33 | <b>Table S2 Physical properties of catalysts.</b>                                                                                                           |
| 34 | <b>Table S3 The results of XPS analysis.</b>                                                                                                                |
| 35 |                                                                                                                                                             |

## 36 **Text S1 Materials and methods**

37 The catalyst slurry was prepared via a ball milling method. Typically, 2.5 g of the  
38 as-prepared Ru/0.1Ce-Co<sub>3</sub>O<sub>4</sub> powder, 7.25 g of deionized water, and 0.25 g of 20 wt.%  
39 aluminum sol (Dezhou Jinghuo Technical Glass Co., Ltd.) were added together and  
40 mixed thoroughly. The resulting mixture was then transferred into a ball mill and milled  
41 for 12 h to obtain the catalyst slurry.

42 The monolithic catalyst was prepared via a coating method. Typically, cordierite  
43 support was immersed in the aforementioned catalyst slurry for 3 min. After being taken  
44 out, the excess slurry on the surface and within the pores of the cordierite support was  
45 thoroughly blown off. The coated cordierite was subsequently dried at 100 °C for 1 h,  
46 and finally calcined at 400 °C for 4 h to obtain the monolithic catalyst.

## 47 **Text S2 Catalyst Characterization**

48 The actual metal contents of catalysts were determined by Inductively Coupled  
49 Plasma Optical Emission Spectrometer technique (ICP-OES, Agilent 725 ES). N<sub>2</sub>  
50 adsorption-desorption tests were carried out using a physical adsorption analyzer  
51 (ASAP 2020 PLUS HD88, Micromeritics, USA) at a temperature of -196 °C. The pore  
52 size distributions were calculated by Barrett–Joyner–Halenda (BJH) method. The  
53 Brunauer–Emmett–Teller (BET) model was used to analyze the surface area. X-ray  
54 diffraction (XRD) patterns were collected using a Rigaku MiniFlex600 diffractometer  
55 with Cu K $\alpha$  radiation at 40 kV and 200 mA. Transmission electron microscopy (TEM,  
56 JEM-2100F, JEOL, Japan) and high-angle annular dark-field scanning transmission  
57 electron microscopy (HAADF-STEM, Themis Z, Thermo Scientific, USA) combined  
58 with energy-dispersive X-ray spectroscopy (EDS, Super-X four-detector system,  
59 Thermo Scientific, USA). Raman spectra was recorded on a confocal Raman  
60 microscope (inVia, Renishaw) with an excitation laser of 532 nm. X-ray photoelectron  
61 spectroscopy (XPS) experiments were conducted using a Thermo Fisher instrument  
62 (ESCALAB 250Xi) with Al-K $\alpha$  as the radiation source. The binding energy of the  
63 carbon (C 1s) was set as 284.8 eV for calibrating the samples.

64 CO pulse chemisorption, temperature-programmed desorption of oxygen (O<sub>2</sub>-  
65 TPD), temperature-programmed reduction in ethane (C<sub>2</sub>H<sub>6</sub>-TPR) and temperature-

66 programmed surface reaction of propane ( $C_2H_6$ -TPSR) were carried out on a BSD-  
67 Chem C200 instrument. Before the CO pulse chemisorption tests, 50 mg of sample was  
68 pretreated with He (30 mL/min) at 200 °C for 1 h. After cooling down to 50 °C, pulse  
69 of 1 % CO balanced with He was injected to the sample and the precious metal  
70 dispersion was calculated on the basis of equation  $Ru/CO = 1/1$  when the adsorption  
71 was complete. Before the  $O_2$ -TPD tests, 50 mg of sample was preheated with He (30  
72 mL/min) at 300 °C for 1 h. After cooling down to 50 °C, 10%  $O_2/He$  was introduced at  
73 30 mL/min for 1h, then He was introduced at 30 mL/min for 1h, Finally, the desorption  
74 of  $O_2$  from the sample was measured by heating the sample from 50 °C to 700 °C at a  
75 ramping rate of 10 °C/min in He (30 mL/min). Before the  $C_2H_6$ -TPR tests, 50 mg of  
76 sample was preheated with He (30 mL/min) at 300 °C for 1 h. After cooling down to  
77 50 °C, 1000 ppm of  $C_2H_6/Ar$  (30 mL/min) was introduced into the reaction tube and  
78 heated to 600 °C at a rate of 10 °C/min. Before the  $C_2H_6$ -TPSR tests, 50 mg of sample  
79 was preheated with Ar (30 mL/min) at 300 °C for 1 h. After cooling down to 50, 1000  
80 ppm of  $C_2H_6/Ar$  (30 mL/min) was introduced at 30 mL/min for 1h, then Ar was  
81 introduced at 30 mL/min for 1 h. Finally, the surface reaction was measured by heating  
82 the sample from 50 °C to 900 °C at a ramping rate of 10 °C/min in 10%  $O_2/He$  (30  
83 mL/min). Record the signals generated during the  $C_2H_6$ -TPR and  $C_2H_6$ -TPSR tests via  
84 mass spectrometry (Hiden HPR-20 R&D, England).

85 In-situ diffuse reflectance infrared Fourier transform spectroscopy (DRIFTS) was  
86 performed on a Bruker Tensor II spectrometer (Bruker) equipped with liquid nitrogen  
87 cooling (-196 °C) and a high-sensitivity mercury cadmium telluride (MCT) detector.  
88 The sample was treated with nitrogen (15 mL/min) at 300 °C for 30 minutes and cooled  
89 to 50 °C to collect the background. Next, the sample was exposed to 1%  $CO/N_2$  for 60  
90 minutes. Finally, the sample was purged with  $N_2$  for 60 minutes, and then the spectrum  
91 was recorded.

92 In-situ DRIFTS of ethane degradation was acquired using a Bruker Tensor II  
93 spectrometer (Bruker) equipped with liquid nitrogen cooling (-196 °C) and a high-  
94 sensitivity mercury cadmium telluride (MCT) detector. The sample was pretreated in  
95 air at 300 °C for 1 h, then cooled to 50 °C. After purging with  $N_2$  for 30 minutes, a

96 background spectrum was collected under N<sub>2</sub>. Following background acquisition at  
97 each temperature point, a gas mixture of 800 ppm C<sub>2</sub>H<sub>6</sub>/N<sub>2</sub> (total flow rate: 30 mL/min)  
98 was introduced into the chamber, and spectra were recorded simultaneously. The  
99 relevant tests are conducted by altering temperature and gas composition, with spectra  
100 recorded at each temperature point. DRIFT spectra were sequentially acquired by  
101 accumulating 64 scans at a spectral resolution of 4 cm<sup>-1</sup>.

### 102 **Text S3 Catalytic Activity Evaluation**

103 The conversion rate of ethane (X) and the yield of CO<sub>2</sub> (Y) are evaluated through  
104 the following equations:

$$X = \frac{c_{in} - c_{out}}{c_{in}} \times 100\%$$

105

106 where  $c_{in}$  and  $c_{out}$  were ethane concentration before the reaction and after oxidation,  
107 respectively.

$$Y = \frac{c_{CO_2}}{c_{in}} \times 100\%$$

108

109 where  $c_{CO_2}$  was the concentration of CO<sub>2</sub> at various reaction temperature points.

110 The kinetic experiments were conducted under conditions of ethane conversion  
111 <20% with a gas hourly space velocity (GHSV) of 120000 mL/(g·h). The first-order  
112 kinetic equation is expressed as:

113

$$\ln r = -E_a/RT + B$$

114 where  $r$  was reaction rate (mmol/(g·s)), calculated from ethane conversion, gas flow  
115 rate, and catalyst mass.  $E_a$  was apparent activation energy (kJ/mol), determined from  
116 the linear relationship between 1000/T and  $\ln r$ .

117 The long-term stability experiment was tested at 260 °C for 60 hours. And the  
118 water resistance test was conducted at 320 °C and 220 °C for 36 hours in the presence  
119 of 10 vol.% water vapor.

120

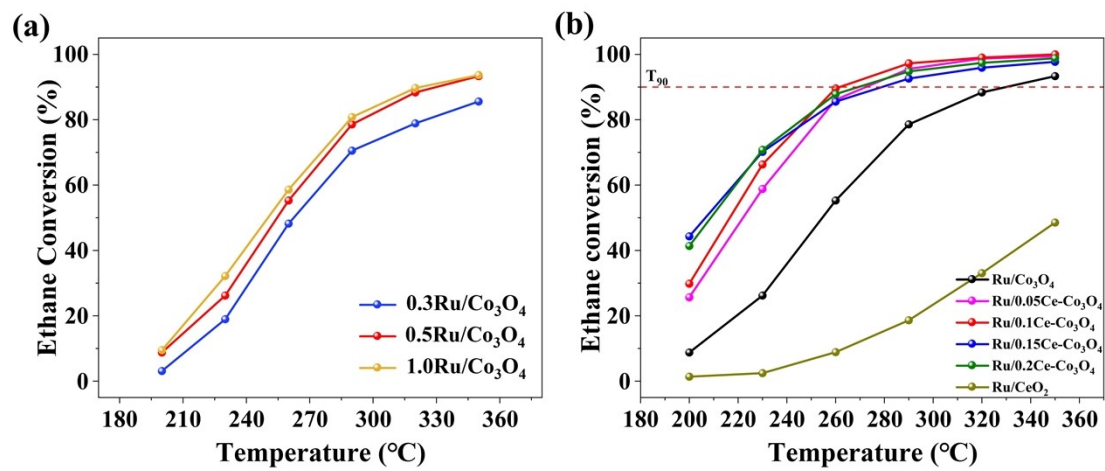

121

122 **Fig. S1** Ethane conversion of different (a) Ru contents of Ru/Co<sub>3</sub>O<sub>4</sub> and (b) Ce contents

123 of Ru/xCe-Co<sub>3</sub>O<sub>4</sub>.

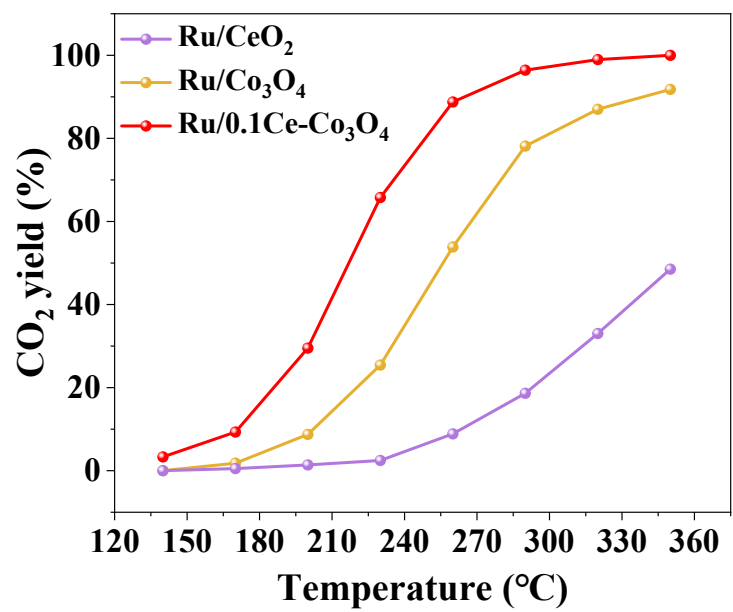

125

126 **Fig. S2** CO<sub>2</sub> yield of Ru/CeO<sub>2</sub>, Ru/Co<sub>3</sub>O<sub>4</sub> and Ru/0.1Ce-Co<sub>3</sub>O<sub>4</sub>.

127

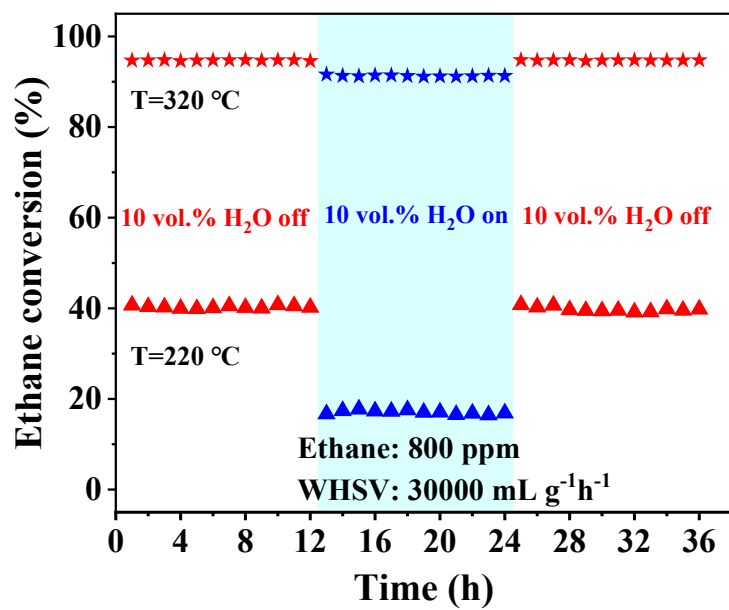

128

129 **Fig. S3** Water resistance test of Ru/0.1Ce-Co<sub>3</sub>O<sub>4</sub> in the presence of 10 vol.% H<sub>2</sub>O.

130

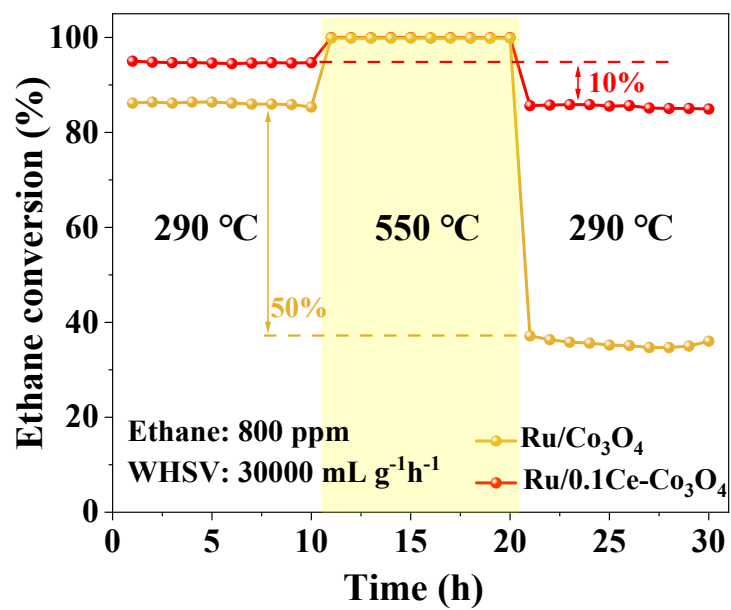

131

132 **Fig. S4** Stability test of high temperature shock on Ru/Co<sub>3</sub>O<sub>4</sub> and Ru/0.1Ce-Co<sub>3</sub>O<sub>4</sub> for  
 133 ethane oxidation.

134

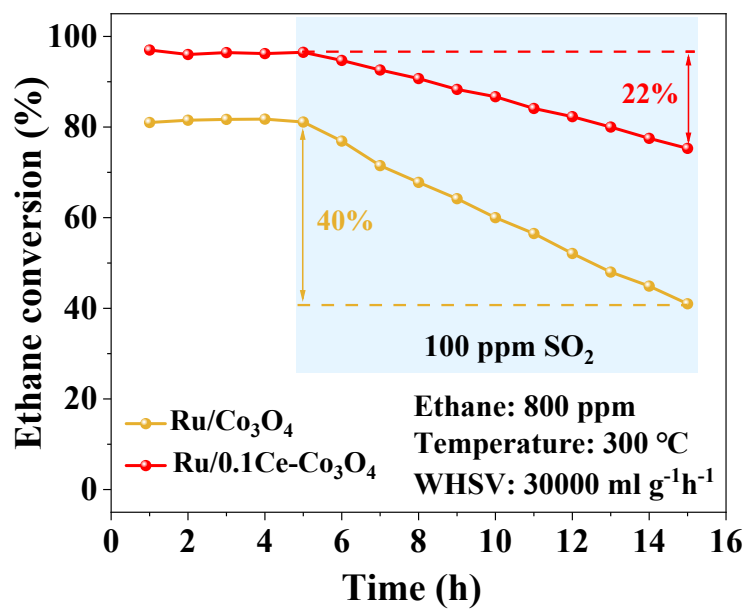

135

136 **Fig. S5** SO<sub>2</sub>-tolerant tests on Ru/Co<sub>3</sub>O<sub>4</sub> and Ru/0.1Ce-Co<sub>3</sub>O<sub>4</sub> for ethane oxidation.

137

138

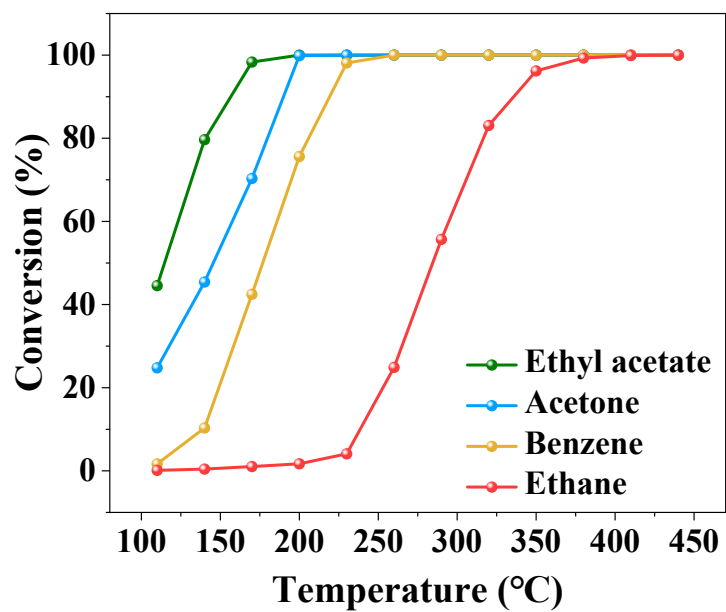

139

140 **Fig. S6** Catalytic oxidation activity of VOCs on monolithic catalysts (VOCs of 800  
141 ppm and GHSV of 12000 h<sup>-1</sup>).

142

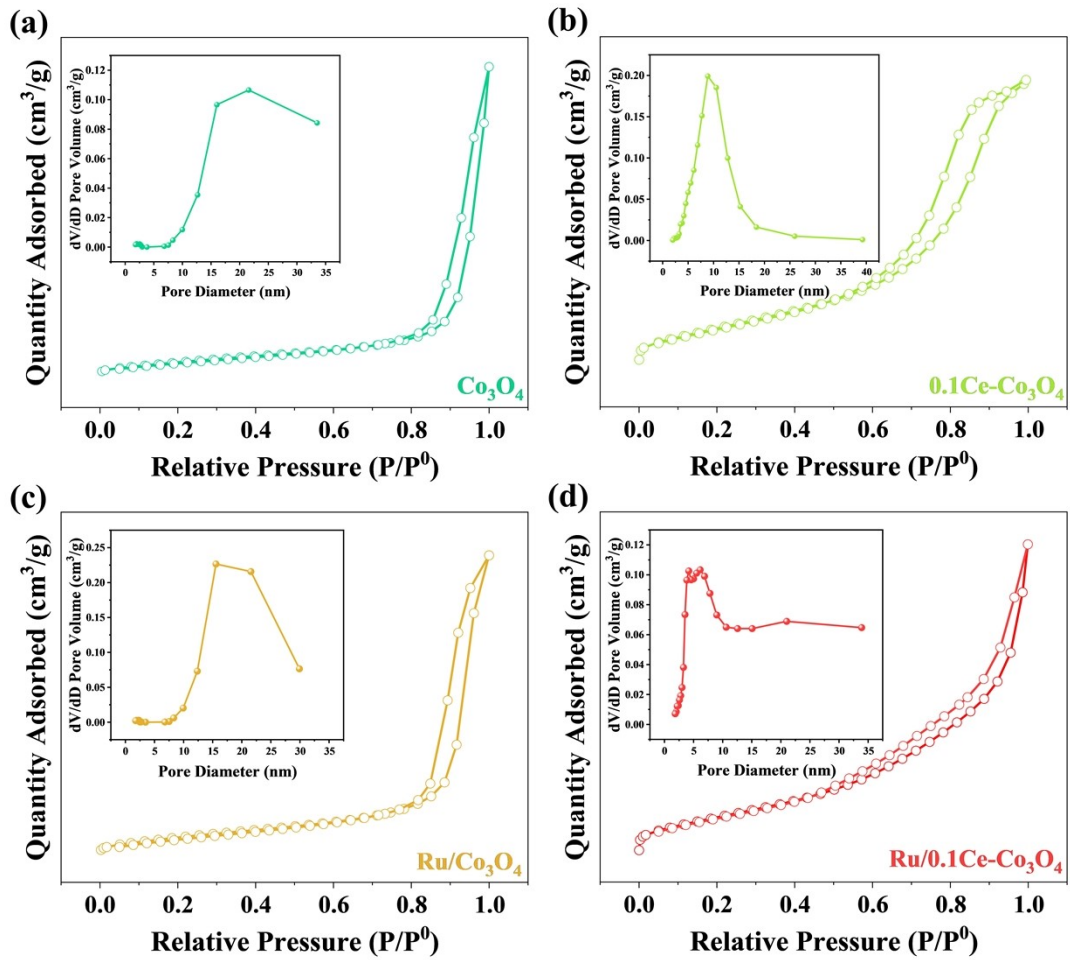

143

144 **Fig. S7**  $N_2$  adsorption-desorption curve and pore diameter distribution of (a)  $Co_3O_4$ .

145 (b)  $0.1Ce-Co_3O_4$ . (c)  $Ru/Co_3O_4$  and (d)  $Ru/0.1Ce-Co_3O_4$ .

146

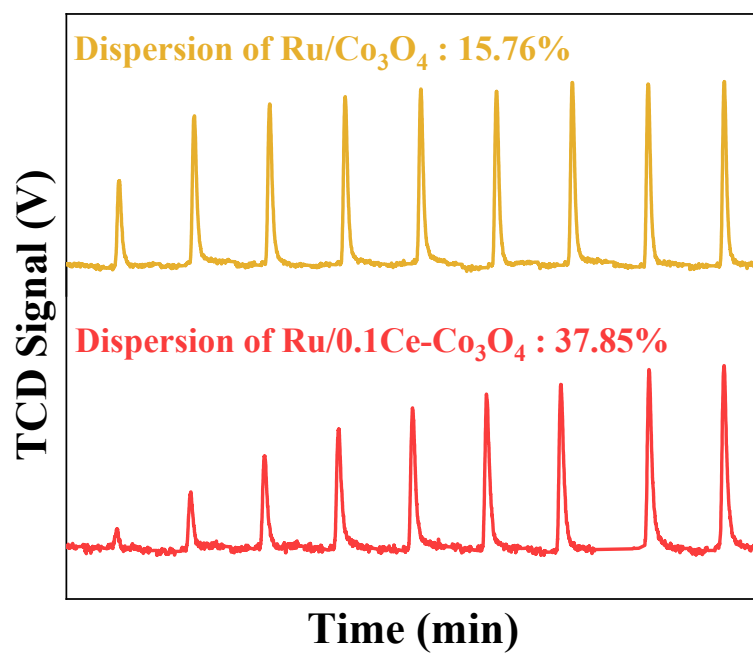

147

148 **Fig. S8** CO pulse patterns of Ru/Co<sub>3</sub>O<sub>4</sub> and Ru/0.1Ce-Co<sub>3</sub>O<sub>4</sub>.

149

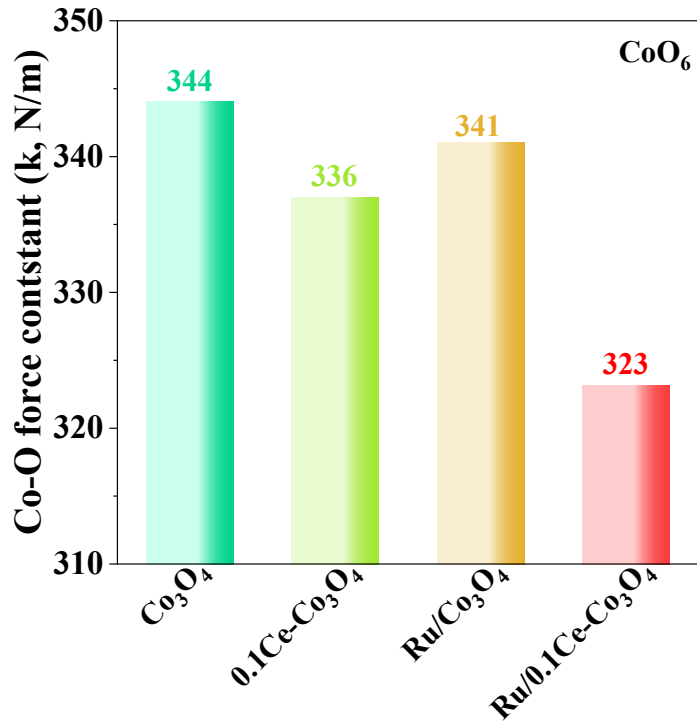

150

151 **Fig. S9** The Co–O bond force constant (k) of CoO<sub>6</sub> in Co<sub>3</sub>O<sub>4</sub>, 0.1Ce-Co<sub>3</sub>O<sub>4</sub>, Ru/Co<sub>3</sub>O<sub>4</sub>  
 152 and Ru/0.1Ce-Co<sub>3</sub>O<sub>4</sub>.

153 The strength of the Co-O bond was further calculated according to Hooke's law<sup>1</sup>

154 
$$\omega = \frac{1}{2\pi c} \cdot \sqrt{\frac{k}{\mu}}$$

155 Where k is the force constant of the Co-O bond, the more likely the Co–O bond will  
 156 break.  $\omega$  is the Raman shift (cm<sup>-1</sup>), c is light velocity, and  $\mu$  is effective mass.

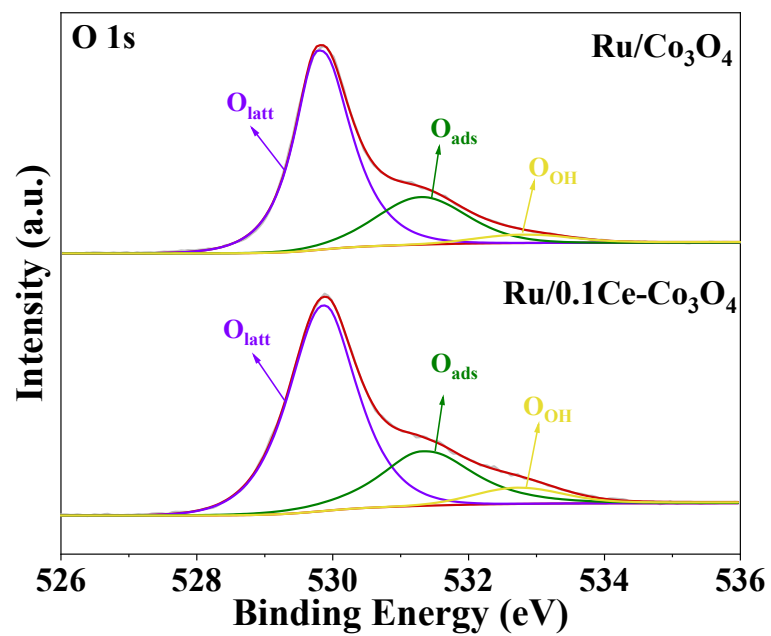

157

158 **Fig S10.** O 1s XPS spectra of Ru/Co<sub>3</sub>O<sub>4</sub> and Ru/0.1Ce-Co<sub>3</sub>O<sub>4</sub>.

159

**Table S1** Catalytic activity for ethane oxidation over various catalysts

| Catalysts                                                                              | Gas feed composition                                                                    | WHSV<br>(mL·g <sub>cat</sub> <sup>-1</sup> ·h <sup>-1</sup> ) | T <sub>90</sub> (°C) | Refs.     |
|----------------------------------------------------------------------------------------|-----------------------------------------------------------------------------------------|---------------------------------------------------------------|----------------------|-----------|
| Ru/0.1Ce-Co <sub>3</sub> O <sub>4</sub>                                                | 1000ppm C <sub>2</sub> H <sub>6</sub> +21% O <sub>2</sub> /N <sub>2</sub>               | 30000                                                         | 260                  | This work |
| NiCo <sub>2</sub> O <sub>4</sub> -TM                                                   | 3000ppm C <sub>2</sub> H <sub>6</sub> +11% O <sub>2</sub> /N <sub>2</sub>               | 48000                                                         | 311                  | 2         |
| Fe <sub>2</sub> O <sub>3</sub> -S                                                      | 2500 ppm C <sub>2</sub> H <sub>6</sub> +21% O <sub>2</sub> /N <sub>2</sub>              | 12000                                                         | 415                  | 3         |
| MnCoO <sub>x-0.5</sub>                                                                 | 3000ppm C <sub>2</sub> H <sub>6</sub> +11% O <sub>2</sub> /N <sub>2</sub>               | 60000                                                         | 220                  | 4         |
| Pt/CZ11                                                                                | 1000ppm C <sub>2</sub> H <sub>6</sub> +21% O <sub>2</sub> /N <sub>2</sub>               | 50000                                                         | 308                  | 5         |
| LMO@CMO-10                                                                             | 1000mg/m <sup>3</sup> C <sub>2</sub> H <sub>6</sub> +21% O <sub>2</sub> /N <sub>2</sub> | 80000                                                         | 341                  | 6         |
| 2%Pd/γ-Al <sub>2</sub> O <sub>3</sub>                                                  | 10000ppm C <sub>2</sub> H <sub>6</sub> +10% O <sub>2</sub> /He                          | 187500                                                        | 450                  | 7         |
| Au/CoO <sub>x</sub>                                                                    | 5000ppm C <sub>2</sub> H <sub>6</sub> +21% O <sub>2</sub> /N <sub>2</sub>               | 15000                                                         | 230                  | 8         |
| 2Pd0.5Pt/Al <sub>2</sub> O <sub>3</sub>                                                | 800ppm C <sub>2</sub> H <sub>6</sub> +21% O <sub>2</sub> /N <sub>2</sub>                | 100000                                                        | 425                  | 9         |
| La <sub>0.7</sub> Bi <sub>0.3</sub> Mn <sub>0.5</sub> Co <sub>0.5</sub> O <sub>3</sub> | 2000ppm C <sub>2</sub> H <sub>6</sub> +21% O <sub>2</sub> /N <sub>2</sub>               | 12000                                                         | 718                  | 10        |
| Pt-Nb/ZrO <sub>2</sub>                                                                 | 0.3%C <sub>2</sub> H <sub>6</sub> +2%O <sub>2</sub> + 97.7%N <sub>2</sub>               | 20000                                                         | 280                  | 11        |
| Pt/Ce <sub>0.01</sub> Ti <sub>0.99</sub> O <sub>2</sub>                                | 1000ppm C <sub>2</sub> H <sub>6</sub> +4% O <sub>2</sub> /N <sub>2</sub>                | 60000                                                         | 370                  | 12        |
| La <sub>0.7</sub> Sr <sub>0.3</sub> Mn <sub>1-x</sub> Co <sub>x</sub> O <sub>3</sub>   | 6% CO+0.2% C <sub>2</sub> H <sub>6</sub> +20% O <sub>2</sub> /Ar                        | 12000                                                         | 380                  | 13        |
| Ce <sub>0.5</sub> Mn <sub>1</sub>                                                      | 500ppm C <sub>2</sub> H <sub>6</sub> +5% O <sub>2</sub> /N <sub>2</sub>                 | 40000                                                         | 320                  | 14        |

| Sample                                  | D <sup>a</sup><br>(nm) | S <sub>BET</sub> <sup>b</sup> (m <sup>2</sup> /g) | V <sub>total</sub> <sup>c</sup> (cm <sup>3</sup> /g) | D <sub>pore</sub> <sup>d</sup> (nm) | Ru content<br>(wt%) | Ce:Co<br>Metal molar ratio |
|-----------------------------------------|------------------------|---------------------------------------------------|------------------------------------------------------|-------------------------------------|---------------------|----------------------------|
| Co <sub>3</sub> O <sub>4</sub>          | 21.0                   | 26.60                                             | 0.13                                                 | 20.39                               | /                   | /                          |
| 0.1CeCo                                 | 8.0                    | 76.71                                             | 0.17                                                 | 8.34                                | /                   | 0.11:1                     |
| Ru/Co <sub>3</sub> O <sub>4</sub>       | 20.3                   | 48.12                                             | 0.20                                                 | 17.55                               | 0.49                | /                          |
| Ru/0.1Ce-Co <sub>3</sub> O <sub>4</sub> | 7.5                    | 107.32                                            | 0.22                                                 | 8.28                                | 0.48                | 0.10:1                     |

162 **Table S2** Physical properties of catalysts.

163 <sup>a</sup> Calculated from the cobalt (220), (311), and (400) planes based on the Scherrer  
164 equation.

165 <sup>b</sup> Surface area by the Brunauer-Emmett-Teller (BET) method.

166 <sup>c</sup> Total pore volumes of P/P<sub>0</sub> = 0.95.

167 <sup>d</sup> Average pore diameter (4 V/A).

168 **Table S3** The results of XPS analysis.

| Sample                                   | O <sub>ads</sub> :O <sub>latt</sub> | Ru <sup>0</sup> :Ru (%) | Ru <sup>n+</sup> :Ru (%) | Ru <sup>4+</sup> :Ru (%) |
|------------------------------------------|-------------------------------------|-------------------------|--------------------------|--------------------------|
| Ru/Co <sub>3</sub> O <sub>4</sub>        | 0.34                                | 17.24                   | 57.47                    | 25.29                    |
| Ru/0.1 Ce-Co <sub>3</sub> O <sub>4</sub> | 0.39                                | 27.61                   | 61.35                    | 11.04                    |

169

170 **Reference**

- 171 1 S. Rong, P. Zhang, F. Liu and Y. Yang, *ACS Catal.*, 2018, **8**, 3435-3446.
- 172 2 S. Liu, H. Wang, S. Wang, Y. Dai, B. Liu, Y. Liu, F. Dang, K. J. Smith, X. Nie, S.  
173 Hou and X. Guo, *ACS Catal.*, 2023, **13**, 4683-4699.
- 174 3 Y. Jian, T. Yu, Z. Jiang, Y. Yu, M. Douthwaite, J. Liu, R. Albilali and C. He, *ACS*  
175 *Appl. Mater. Interfaces*, 2019, **11**, 11369-11383.
- 176 4 H. Wang, S. Wang, S. Liu, Y. Dai, Z. Jia, X. Li, S. Liu, F. Dang, K. J. Smith, X.  
177 Nie, S. Hou and X. Guo, *Nat. Commun.*, 2024, **15**, 4118-4133.
- 178 5 Q. Fu, S. Wang, T. Wang, D. Xing, X. Yue, M. Wang and S. Wang, *J. Catal.*, 2022,  
179 **405**, 129-139.
- 180 6 J. Qin, P. Zhao, J. Meng, S. Zuo, X. Wang, W. Zhu, W. Liu, J. Liu and C. Yao, *Appl.*  
181 *Surf. Sci.*, 2024, **653**, 159393-159402.
- 182 7 O. Demoulin, B. Le Clef, M. Navez and P. Ruiz, *Appl. Catal. A-Gen.*, 2008, **344**, 1-  
183 9.
- 184 8 B. E. Solsona, T. Garcia, C. Jones, S. H. Taylor, A. F. Carley and G. J. Hutchings,  
185 *Appl. Catal. A-Gen.*, 2006, **312**, 67-76.
- 186 9 Z. Ma, J. Zhou, J. Lin, G. Yang, S. Liu and G. Li, *Fuel*, 2024, **374**, 132437-132446.
- 187 10 A. Gholizadeh and A. Malekzadeh, *Int. J. Appl. Ceram. Technol.*, 2017, **14**, 404-  
188 412.
- 189 11 B. Cen, C. Tang, J. Lu, J. Chen and M. Luo, *Chin. J. Catal.*, 2021, **42**, 2287-2295.
- 190 12 D. Wu, X. Lv, X. Ren, C. Hou, Q. Ma, J. Yao and J. Hu, *Catalysts*, 2023, **13**, 626-  
191 640.
- 192 13 A. Gholizadeh, A. Malekzadeh and M. Ghiasi, *Ceram. Int.*, 2016, **42**, 5707-5717.
- 193 14 S. Du, J. Hu, J. Wang, S. Wang, J. Hou, J. Li, Y. Su, L. Chang, H. Qin, Y. Wang  
194 and W. Bao, *Fuel*, 2023, **350**, 128762-128772.

195
